# Supplementary material for: Correlation between long-term glycemic variability and cognitive function in middle-aged and elderly patients with type 2 diabetes mellitus: a retrospective study
Source: PeerJ. 2023 Dec 20;11:e16698. doi: 10.7717/peerj.16698 (PMC10748480; doi:10.7717/peerj.16698)
Supplement: Supplemental Information 1 [file peerj-11-16698-s001.xlsx]

## Sheet: Sheet1
ID	MMSE	MOCA	GLP-1RA (0:No;1:Yes)	Insulins (0:No;1:Yes)	Insulin secretagogues (0:No;1:Yes)	DPP-4 inhibitors (0:No;1:Yes)	Thiazolidinediones (0:No;1:Yes)	a-glucosidase inhibitors (0:No;1:Yes)	Metformin (0:No;1:Yes)	SGLT-2 Inhibitors (0:No;1:Yes)	Coronary heart disease (0:No;1:Yes)	Smoking (0:No;1:Yes)	Family history of diabetes (0:No;1:Yes)	Group (0：Non-MCI group；1：MCI group)	Age (years)	diabetic Duration (years)	Education	gender (0: female, 1: male )	height (cm)	weight (kg)	BSA (m2)	BMI (kg/m2)	SBP (mmHg)	DBP (mmHg)	24h urinary protein (mg/L)	UACR (mg/g)	SCR (μmol/l)	SCR (mg/dl)	eGFR (ml/min/1.73m2)	TC (mmol/L)	ALT (U/L)	AST (U/L)	T3 (nmol/L)	T4 (nmol/L)	TSH (mIU/L)	The lastest HbA1c (%)	The lastest FPG (mmol/l)	FC-P (ng/ml)	HOMA-β (%)	HOMA-IR	HbA1c①(%)	HbA1c②(%)	HbA1c③(%)	HbA1c④(%)	HbA1c⑤(%)	HbA1c⑥(%)	HbA1c⑦(%)	HbA1c ⑧ (%)	HbA1c ⑨(%)
1	25	22	0	1	0	0	0	1	0	1	1	0	1	0	63	5	1	1	168	62	1.70405	21.97	137	79	83.2	12.672	51	0.5763	98.1171	3.78	29	22	1.82	109.1	3.12	9.5	8.07	2.22	54.7	1.89	9.5	11.3	9.6
2	26	26	0	0	0	1	1	0	1	0	0	0	0	0	58	17	3	0	157	51	1.49318	20.69	110	58	27.5	24.43	51	0.5763	83.3751	4.49	15	22	1.41	104.9	2.393	7.2	5.78	1.72	84.4	1.32	7.2	7.3	8.1	7.7
3	22	17	1	1	0	0	1	1	0	0	1	0	1	0	60	10	0	0	158	61	1.61867	24.44	133	80	86.15	46.64	56	0.6328	81.7349	7.13	16	22	1.6	106.5	3.457	6	6.79	5.27	141.5	4.24	6	5.5	5.5	6.2	6.4	6.4	6.1	5.9
4	28	27	0	0	1	0	0	0	0	1	0	0	1	0	59	15	3	1	180	73	1.92022	22.53	119	72	102	8.6	110	1.243	50.001	5.04	21	18	1.25	79	1.958	7	7.8	4.29	95.4	3.61	7	7.4	8
5	24	17	0	0	0	1	0	1	0	0	0	0	0	0	69	6	0	1	168	71	1.8051	25.16	129	75	114	11.26	70	0.791	71.2579	5.06	28	42	1.41	84.7	2.079	8.7	6.68	2.18	76.1	1.75	8.7	8.7	7.8	8	9.4
6	27	25	1	0	0	0	1	0	0	1	1	0	0	0	58	24	3	1	169	74	1.84505	25.91	134	91	188	41.96	48	0.5424	122.38	3	35	33	1.51	110	0.537	9.2	8.56	2.68	56.8	2.33	9.2	8	6.8	6.9	6.5
7	27	27	0	0	0	1	0	0	1	1	0	0	1	0	58	8	2	0	162	78	1.82981	29.72	128	68	90	13.84	44	0.4972	120.61	4.57	17	16	1.34	106.6	0.945	9.2	5.5	1.78	95.1	1.35	9.2	8	9.3	8.7	8.4
8	26	27	0	1	0	1	0	1	0	0	1	0	0	0	64	15	3	0	155	57	1.55097	23.73	141	85	80.5	16.48	43	0.4859	98.6165	5.68	20	17	1.5	134.6	2.723	7.1	4.67	0.63	64.5	0.45	7.1	7.1	7.1	6.7	6.5	6.1	6.5	6.8	6.7
9	23	21	0	0	0	1	0	0	1	0	0	0	1	0	52	11	1	1	176	86	2.02547	27.76	126	84	67.2	17.49	55	0.6215	121.341	3.77	23	29	1.638	96.28	1.206	6.5	6.22	3.73	127.8	2.92	6.5	5.8	7.6	6.5	7	8.1
10	30	28	1	0	1	0	0	0	0	1	0	0	0	0	62	21	2	1	169	62	1.7114	21.71	152	71	42.18	60.03	56	0.6328	90.1285	3.79	27	30	1.07	64.39	1.75	9.9	11.34	1.43	21.9	1.37	9.9	10.2	8.3
11	29	27	0	0	0	1	0	0	1	0	1	0	1	0	66	23	3	0	160	66	1.68912	25.78	122	63	122	27.96	54	0.6102	81.2935	2.87	12	18	1.433	108.8	3.052	8.6	6.61	1.07	46.9	0.86	8.6	7.5	7.8
12	27	25	0	0	0	1	0	0	1	1	0	1	0	0	66	13	3	0	158	54	1.53695	21.63	139	71	158.1	20.7	72	0.8136	54.8234	6.01	18	21	1.37	96.9	4.57	7.5	7.7	2.05	56.1	1.72	7.5	8.2	7
13	28	29	1	0	0	0	0	1	0	1	0	0	1	0	63	3	3	0	160	62	1.64483	24.22	110	78	93.6	16.77	55	0.6215	80.1186	4.2	21	20	1.21	80.1	1.193	6.8	8	1.76	46.8	1.5	6.8	8.4	6.9	6.2	6.7	6.8
14	28	28	0	0	1	0	1	0	1	0	0	1	1	0	56	19	4	1	171	66	1.77253	22.57	125	66	94.58	20.043	62	0.7006	90.1055	4.8	18	42	2.13	90.89	2.67	6.8	7.7	1.45	43.7	1.22	6.8	6.4	7.8	7	6.9	6.5	6.9	6.6	7.3
15	29	26	0	0	0	1	0	0	1	1	1	0	0	0	59	2	3	0	156	68	1.67957	27.94	132	95	49.6	10.5	76	0.8588	65.5112	4.64	16	17	1.83	101.9	2.9	6.5	6.52	2.54	88.8	2.02	6.5	7	8	8
16	27	25	0	1	0	0	0	1	0	0	0	0	0	0	61	9	3	0	151	54	1.48728	23.68	111	78	77	31.31	43	0.4859	101.273	4.64	20	22	1.93	112.3	2.27	8.4	7.08	2.38	72.8	1.95	8.4	7.2	8.2	7.6	6.5
17	24	25	0	1	0	0	0	1	0	1	0	1	1	0	60	16	4	1	176	68.5	1.83879	22.11	135	76	142	29.71	69	0.7797	77.1462	4.55	25	22	2.01	110.6	3.34	5.7	4.95	2.22	135.6	1.62	5.7	6.3	5.9
18	30	28	1	0	1	0	0	0	0	1	0	0	0	0	65	14	3	1	165	78	1.85431	28.65	125	65	72.5	36.38	46	0.5198	122.498	3.34	31	23	1.45	93.7	2.315	9	8.6	1.43	35.3	1.25	9	9.7	10.2	10.8	9.8	9.4	9.7	9.5
19	24	24	1	0	1	0	0	0	1	0	0	0	1	0	60	19	1	1	165	63	1.69341	23.14	103	71	27.3	15.83	59	0.6667	90.1013	6.17	17	23	1.53	86	2.482	7.5	6.92	2.64	81.9	2.14	7.5	7.5	7.4	6.7	7.9
20	30	27	0	1	0	1	0	0	0	0	0	0	0	0	64	18	4	0	156	49	1.46122	20.13	131	58	79.28	17.6	46	0.5198	84.1144	4.4	28	22	1.34	84.5	3.154	7.2	7.34	2.54	71.6	2.1	7.2	7.6	6.7
21	30	30	0	0	1	1	0	0	0	1	0	1	0	0	53	9	3	1	173	60	1.71658	20.05	100	65	45	10.1	85	0.9605	63.9002	4.9	21	20	1.27	75.2	1.592	7.2	5.78	1.95	92.2	1.5	7.2	6.7	7.8
22	23	23	0	0	0	0	0	1	1	0	1	0	0	0	72	8	1	0	170	67	1.77633	23.18	128	70	63	41.9	52	0.5876	74.8842	4.33	33	26	1.81	100.3	0.137	7.5	7.23	2.62	75.2	2.16	7.5	7.5	8.3	8.6	6.5
23	26	27	1	0	1	0	1	0	0	0	0	1	0	0	64	19	3	1	174	81	1.95826	26.75	128	67	76.5	18.19	78	0.8814	71.986	5.56	33	33	1.443	84.45	1.328	7.3	6.93	3.66	103.9	2.97	7.3	7	8.2	7.8
24	29	26	0	0	0	0	0	0	1	1	0	0	1	0	59	16	3	0	163	63	1.6785	23.71	116	76	81.35	27.97	44	0.4972	104.902	2.97	11	17	1.31	84.72	2.25	7	8.3	0.82	25.3	0.71	7	7.1	8	7.2
25	27	27	0	0	0	1	0	0	1	0	0	1	0	0	65	16	3	0	155	58	1.56248	24.14	100	62	10.8	11.87	50	0.565	84.5355	5.32	12	17	1.57	102.8	1.26	6.7	4.9	2.06	131.3	1.5	6.7	7.9	7.4	7.2	6.6	6.7
26	21	24	0	1	0	0	1	0	0	1	0	0	0	0	66	18	1	1	159	66	1.68146	26.11	142	87	186	57.7	65	0.7345	79.8163	4.78	21	22	1.49	111.6	0.931	10.7	7.63	1.25	39.9	1.05	10.7	11.5	12.3	12.9
27	22	22	0	0	0	0	0	0	1	1	0	0	0	0	64	23	1	1	168	78	1.87869	27.64	135	70	52.5	19.97	53	0.5989	106.339	3.12	35	29	1.82	98.9	0.99	5.8	4.6	1.73	131.7	1.23	5.8	7.9	6.2	7	6.2	6.8	6.8
28	26	25	0	1	0	1	0	0	0	0	0	0	1	0	57	7	3	1	170	72	1.8315	24.91	123	88	35	8.31	67	0.7571	86.9846	4.6	15	13	1.73	95.06	1.838	7.5	7.59	3.74	90	3.12	7.5	7.6	6.5
29	29	29	0	0	0	0	0	1	1	0	0	0	0	0	61	11	4	1	173	73	1.86579	24.39	119	70	36.9	14.4	84	0.9492	65.7239	4.66	18	22	1.35	108.1	1.847	8.6	8.4	2.99	63.8	2.58	8.6	8.1	9.2	7.8
30	30	28	1	0	0	0	0	0	0	1	0	1	0	0	59	12	2	1	173	92	2.05854	30.74	109	67	40.7	67.49	97	1.0961	66.6586	4	17	18	2.4	99.38	2.61	8	8.45	3.72	74.7	3.21	8	7.8	7.5	7.4	7.7	8
31	28	26	0	0	1	0	1	1	0	0	0	0	1	0	55	20	4	0	164	69	1.75242	25.65	119	76	92.4	13.92	81	0.9153	62.7303	5.53	16	15	2.14	106	3.58	6.1	5.95	4.9	169.1	3.79	6.1	6	6	6	6.2	5.9	6.2	6.1
32	27	26	0	0	0	1	0	0	1	0	1	1	1	0	55	2	2	0	158	72	1.73684	28.84	122	81	35.7	7.47	51	0.5763	104.895	5.87	21	19	1.49	112	2.291	6.5	5.82	3.24	130.4	2.49	6.5	6.2	5.8
33	29	28	0	0	0	0	0	0	0	1	0	0	1	0	56	22	4	0	173	70	1.83281	23.39	128	67	130	62.23	56	0.6328	86.9774	4.13	14	16	1.64	98.5	2.385	6.8	6.71	1.13	47.4	0.91	6.8	7.3	7.5	6.8
34	23	21	1	1	0	0	0	1	0	0	0	0	0	0	51	16	1	1	171	68	1.79517	23.26	115	68	69	29.99	96	1.0848	62.7245	0.76	37	17	1.56	92.41	1.999	10	8.39	1.07	30	0.93	10	10.7	11.8	12	11.9
35	27	27	1	0	0	0	0	0	0	1	1	0	0	0	67	13	3	1	170	89	2.00416	30.8	139	79	216	19.5	52	0.5876	111.35	6.54	39	25	1.21	82.03	1.79	7.4	8.97	2.04	42.6	1.8	7.4	7.1	6.6	6.7	6.9	6.5
36	29	26	0	0	1	0	0	0	0	1	0	0	0	0	60	13	4	1	175	77	1.92454	25.14	133	74	56	18.7	56	0.6328	102.089	3.4	30	26	2.2	155	0.004	9.7	7.42	1.05	37.2	0.87	9.7	9.9	9.6	9	10
37	29	30	1	0	0	0	0	0	1	1	0	1	1	0	58	16	2	1	168	72	1.81586	25.51	133	88	80.5	9.34	79	0.8927	73.5109	3.79	16	20	1.46	102.3	2.198	8.1	6.47	0.88	42.7	0.7	8.1	7.1	6.6	6.8	7.2	6.8	7.2	7.9
38	25	23	0	1	0	0	0	1	0	0	0	0	0	0	53	26	1	1	169	87	1.97642	30.46	132	73	37.7	37.62	74	0.8362	92.436	3.84	16	19	1.55	105.8	1.282	6.4	6.48	2.36	85.2	1.88	6.4	6.7	6.4	6.4	6.2	5.9	6.9	7
39	30	29	1	0	0	0	0	0	1	1	0	1	0	0	56	11	2	1	171	70	1.81742	23.94	131	94	147	18.14	76	0.8588	76.0367	3.03	25	19	1.21	90	3.174	7.6	9.65	4.31	67.8	3.88	7.6	7.3	6.9
40	27	28	1	0	0	0	0	0	0	1	0	0	0	0	51	2	4	1	172	80	1.93169	27.04	128	87	43.5	12.46	74	0.8362	88.9662	4.74	10	17	1.77	93.75	1.53	5.6	5.76	1.93	92.1	1.48	5.6	5.7	5.7	6.5
41	26	25	0	0	1	0	0	1	0	0	1	0	1	0	72	5	4	1	176	79	1.95368	25.5	132	78	103	8.48	80	0.904	61.3912	5.6	35	19	2.32	149.4	3.37	6.1	5.33	2.48	127.2	1.86	6.1	5.8	5.4	6	6.1	5.4
42	27	25	1	1	0	0	0	0	0	1	0	0	0	0	60	13	4	1	180	65	1.82779	20.06	136	70	50.05	35.135	53	0.5989	95.8771	3.69	33	28	1.78	110.4	0.02	7.6	8.04	1.12	33.5	0.96	7.6	7.5	7.2
43	28	25	0	1	0	1	0	0	0	0	1	1	1	0	58	9	2	1	172	76	1.89004	25.69	119	76	86.4	14.33	61	0.6893	96.5477	6.17	14	17	1.28	79.1	2.066	8.6	9.39	2.11	40.4	1.89	8.6	7.6	8.8	7.4
44	19	19	1	0	0	0	0	0	1	1	0	0	0	0	69	17	1	0	152	56	1.51769	24.24	135	83	55	10.736	53	0.5989	75.0449	4.32	30	24	1.71	130.2	2.19	5.7	6.63	1.84	68.3	1.47	5.7	6.7	7.1	5.6
45	30	25	0	1	0	0	0	0	0	0	0	1	0	0	65	13	3	1	178	78	1.95912	24.62	134	76	48	10.2	68	0.7684	78.4333	6.02	13	16	1.33	76.7	2.132	8.7	5.54	1.73	91.9	1.31	8.7	9.7	10.3
46	24	20	1	0	0	0	0	0	1	1	0	0	0	0	59	2	1	0	153	49	1.44079	20.93	115	72	46.8	10.61	60	0.678	69.7047	4.64	9	17	1.34	113.2	3.33	7.5	5.49	3.49	153.2	2.63	7.5	8.6	8
47	22	20	0	0	1	1	0	0	0	0	1	1	0	0	73	8	1	1	160	78	1.8134	30.47	152	70	60	7.57	75	0.8475	68.6324	3.59	18	18	1.69	83.3	1.327	6.8	7.01	3.27	93.6	2.66	6.8	6.5	6.6	6.2	7.2	8.8
48	25	23	1	0	0	0	0	0	1	1	0	0	0	0	64	6	1	1	170	92	2.0326	31.83	165	79	63	26.09	103	1.1639	59.6523	4.5	11	17	1.28	104.1	2.45	7.9	9.47	1.87	36.3	1.68	7.9	6.5	6	6.5	8.2
49	28	28	1	1	0	0	0	1	0	0	0	0	1	0	65	24	4	1	160	63	1.65605	24.61	142	68	64	16.19	61	0.6893	83.5436	3.23	25	18	1.76	121.8	1.49	7.6	7.35	2.42	68.9	2	7.6	8.3	8.8	7.5
50	28	25	0	0	0	1	0	0	1	1	0	1	0	0	63	8	4	1	175	78	1.93513	25.47	112	67	54.4	14.56	53	0.5989	104.596	3.54	13	20	1.76	68.9	3.06	7.7	6.5	1.54	62.5	1.23	7.7	7.4	8	7	6.2
51	22	20	0	0	1	0	0	0	0	0	1	0	0	0	67	16	1	0	148	61.5	1.54909	28.08	142	79	47.5	24.87	48	0.5424	91.6668	4.53	20	19	1.46	78.44	0.99	7.4	10.52	1.72	28.6	1.6	7.4	8.1	9.1
52	26	26	1	0	0	0	0	0	1	0	0	0	1	0	63	5	2	0	152	71	1.67876	30.73	127	84	89.72	20.97	37	0.4181	133.627	4.34	6	11	2	85.94	2.58	7.7	9.38	2.43	45.1	2.17	7.7	7.4	6.4
53	28	27	0	1	0	0	0	0	1	1	0	1	0	0	58	10	4	1	170	84	1.95551	29.07	134	82	93.15	21.49	71	0.8023	88.6112	2.37	13	15	1.57	93.86	3.55	6	6.95	2.1	68.8	1.71	6	6.1	6.3
54	27	25	1	0	0	0	1	0	0	1	0	1	0	0	58	10	2	1	180	88.5	2.08396	27.31	132	83	118.25	42.36	50	0.565	124.398	4.79	17	17	1.67	94.94	1.22	6.7	6.45	2.93	100.4	2.33	6.7	7.5	6.5	7.8	6	7.7	7.8	6.5	6.3
55	26	26	0	1	0	0	0	0	1	0	0	0	0	0	58	10	2	0	157	56	1.55372	22.72	100	62	87	28.41	42	0.4746	106.835	5.49	23	28	1.79	91.42	6.02	8.2	6	0.61	75.7	1.27	8.2	7.3	7.9
56	25	26	0	1	0	0	1	0	0	0	0	0	1	0	50	12	3	1	168	72	1.81586	25.51	112	71	187.5	63.184	75	0.8475	84.9858	5.57	16	15	1.3	91.81	1.91	9.2	7.6	3.22	80.2	2.69	9.2	7.7	8.4	7.8	7.6
57	30	27	1	0	0	0	0	1	0	1	0	0	1	0	54	11	4	1	168	76	1.85807	26.93	104	76	73.5	20.24	94	1.0622	66.8401	4.85	24	24	1.31	69.05	1.41	7.2	5.95	2.26	96.8	1.75	7.2	6.1	6	5.9	5.4	7.2	7.1	6.2
58	23	20	0	0	0	1	0	0	1	0	1	0	0	0	65	11	1	1	165	78	1.85431	28.65	127	74	95.5	27.896	71	0.8023	79.3651	4.15	28	22	1.71	86.83	2.72	6.9	8.06	2.91	67.1	2.48	6.9	6.7	6.6	7.7	6.8
59	28	26	1	0	1	0	0	0	0	0	0	1	0	0	53	5	4	1	173	73	1.86579	24.39	144	99	70	10.648	57	0.6441	106.664	6.18	13	15	1.17	108.6	0.94	8.4	6.74	1.63	60.8	1.31	8.4	7	7.7	7.6	8.1	9.4	8.8	9.6	9.3
60	27	22	0	0	0	0	0	1	0	1	0	0	0	0	56	11	1	0	157	59.5	1.59428	24.14	128	67	24.3	19.36	47	0.5311	101.267	4.53	11	11	1.49	82.88	1.68	8.4	6.96	3.4	97.6	2.76	8.4	8.6	8	7	7.7	7.7	8	7.6
61	29	20	1	0	0	0	0	0	1	0	1	1	1	0	67	11	1	1	172	76	1.89004	25.69	114	65	72	14.608	76	0.8588	68.987	2.81	14	17	1.44	60.95	1.88	9	8.47	2.11	48.4	1.83	9	7.1	7.5	7.2	7.4
62	23	20	0	1	0	1	0	0	0	1	0	0	0	0	68	12	1	1	174	82	1.9685	27.08	131	68	85.58	17.88	71	0.8023	75.4514	4.33	17	17	1.51	97.6	0.925	7.5	6.92	2.66	82.3	2.16	7.5	7.3	6.4	7.6	6.7	6.3	6.2	8.8
63	27	26	0	0	0	1	0	1	0	0	1	1	1	0	71	21	2	0	158	62	1.62989	24.84	117	58	124.8	61.62	59	0.6667	67.5403	3.27	15	17	1.33	102.2	3.38	7.4	6.8	1.79	63.9	1.45	7.4	6.8	6.8	6.5	6.6	6.7	6.3	6.1	6.2
64	29	26	1	0	0	0	0	0	0	1	0	0	1	0	54	11	2	0	160	53	1.53876	20.7	106	67	60	38.31	44	0.4972	102.208	3.29	15	24	1.43	97.5	1.588	6.9	6.09	1.44	67.5	1.12	6.9	6.3	6.7	6.7	6.6	6.4	6.4	6	6.3
65	24	27	0	0	0	1	0	0	1	0	0	0	0	0	54	13	1	1	169	67	1.76875	23.46	102	66	69	13.9	64	0.7232	90.9163	3.55	16	16	1.07	97.2	3.249	6.1	6.12	2.55	100.1	1.99	6.1	6.5	6.5	6.5	6
66	27	25	1	0	0	0	0	0	1	0	0	1	1	0	65	11	2	1	171	96	2.07852	32.83	121	70	176.4	33.6	57	0.6441	108.547	2.92	39	17	1.49	68.9	1.019	5.4	4.87	2.16	137.3	1.57	5.4	5.2	5.8	5.7	5.3	5.3
67	28	25	0	1	0	0	0	1	0	0	0	0	1	0	57	21	4	1	161	63	1.66355	24.3	107	65	144	14	51	0.5763	110.085	2.89	21	18	1.14	59.28	1.02	6.2	6.12	0.89	47.9	0.7	6.2	7.2	6.2	6.5	6	6.5	6.8	7	6.6
68	29	26	1	0	0	0	0	0	1	0	0	0	0	0	59	12	4	1	174	79	1.93756	26.09	117	71	123	58.28	52	0.5876	113.44	5.81	16	18	1.75	105.45	2.396	6.5	6.23	2.05	82.9	1.61	6.5	6.9	7	6.2	5.8	5.9	6.3	6.1
69	28	26	0	0	1	0	0	0	0	1	0	0	1	0	56	21	3	0	151	60	1.55539	26.31	127	74	115.6	11.56	63	0.7119	78.088	4.48	14	18	1.17	66.23	2.5	6.7	7.66	3.84	90.4	3.22	6.7	7.7	6.6	6.3	7.5	5.7
70	27	27	0	1	0	1	0	0	0	0	0	1	0	0	54	6	2	0	158	59	1.5959	23.63	124	70	91.5	41.96	76	0.8588	63.5134	3.84	18	23	1.57	94.9	3.091	8.7	8.92	2.39	48.5	2.11	8.7	7.9	7.9	9.2	7.7
71	30	26	1	0	0	0	0	1	1	0	0	0	0	0	60	17	2	1	165	77	1.84417	28.28	121	60	63	95.97	74	0.8362	80.6237	4.77	16	20	1.14	70.7	1.282	8.9	6.98	1.1	43.1	0.9	8.9	7.7	8.2
72	30	29	0	1	0	1	0	0	0	0	1	0	0	0	56	8	4	1	160	74	1.77328	28.91	115	76	100.5	9	73	0.8249	85.7681	3.35	23	17	1.313	88.96	1.598	6.9	6.66	2.84	92.6	2.28	6.9	8	7.5	6.7	6.4	7.4
73	20	18	0	0	0	1	0	0	0	0	1	0	0	0	74	16	0	1	164	77	1.83606	28.63	144	89	70.95	17.483	64	0.7232	77.2471	4.6	14	14	1.37	109.9	1.49	9.4	11.19	0.89	15.8	0.85	9.4	7.4	7.2	7.6	7.1	8.2	7.2	6.9	7.5
74	28	27	1	0	0	0	1	0	0	1	0	0	1	0	54	6	2	1	170	72	1.8315	24.91	128	77	32.3	13.57	58	0.6554	104.114	4.53	13	16	1.74	94.9	4.601	7.5	7.19	1.61	53.4	1.32	7.5	6.7	6.5	6.5	7.4	6.2
75	27	25	0	0	0	0	0	1	0	1	0	0	0	0	54	10	2	1	170	72	1.8315	24.91	121	76	70	6.88	60	0.678	100.644	4.15	18	18	1.66	89.39	1.09	7.9	7.22	0.89	34.9	0.73	7.9	7.7	9	7.5
76	27	25	1	0	0	0	0	0	1	0	0	1	0	0	56	4	2	1	174	85	1.99879	28.08	126	86	69.6	12.87	91	1.0283	70.1138	3.99	15	21	1.63	82.9	1.51	6.5	6.03	4.32	150.5	3.36	6.5	6	5.6	5.6
77	28	28	0	1	0	0	0	1	0	0	0	0	0	0	56	12	3	1	173	78.5	1.92428	26.23	100	66	87.65	16.932	73	0.8249	83.8438	3.97	15	30	1.61	125	5.556	6.5	5.27	2.87	144	2.14	6.5	6.7	7.7	6.8	7	6.5	6.8	6.5	6
78	28	27	0	0	1	1	0	0	0	0	0	0	1	0	55	9	4	1	173	77	1.90857	25.73	126	81	24.7	15.2	67	0.7571	91.42	2.67	12	16	1.82	88.8	1.585	6.3	4.44	2.31	171.9	1.63	6.3	6.1	6
79	27	27	0	1	0	0	0	0	1	0	1	1	0	0	59	13	2	1	170	83	1.94558	28.72	116	78	36.4	15.59	54	0.6102	114.297	3.6	19	22	0.92	59.8	5.08	9.2	5.22	2.57	135.7	1.91	9.2	7.5	7	7.1
80	23	23	1	0	0	0	0	0	0	1	0	0	1	0	67	19	1	1	165	69	1.76016	25.34	153	85	57.9	22.904	79	0.8927	64.7003	4.12	13	17	1.7	136.2	0.92	7.6	5.15	1.48	95	1.1	7.6	7	5.9	7.5	6.4
81	25	26	1	1	0	0	0	0	0	0	0	0	0	0	61	7	3	1	171	80	1.92354	27.36	135	70	61.5	10.23	57	0.6441	102.957	4.14	21	17	1.3	81.59	1.07	5.9	6.43	2.71	95.4	2.15	5.9	6.1	6.2	7
82	28	28	0	0	0	0	1	0	0	1	0	0	1	0	53	8	3	1	166	70	1.77874	25.4	124	82	20	22.14	53	0.5989	115.384	5.55	18	20	1.68	82.49	1.2	9.8	5.05	1.25	87.9	0.92	9.8	8.7	9.8
83	28	26	1	1	0	0	0	0	0	0	1	1	0	0	72	18	3	0	157	65	1.65532	26.37	124	72	48	25.893	69	0.7797	58.7523	4.32	20	20	1.62	127.6	3.117	6.4	5.9	2.86	116.3	2.21	6.4	6.5	6.3	7	6.2	7.2	6.8
84	23	22	0	0	0	0	0	0	1	1	0	0	1	0	67	16	1	0	153	80	1.77452	34.17	149	80	48	12.49	52	0.5876	96.0864	4.99	15	11	1.22	87.9	2.663	9.7	8.27	4.6	91.4	3.94	9.7	10.3	8.2
85	27	25	1	0	0	0	0	1	0	0	0	1	0	0	64	19	3	1	171	61.5	1.72013	21.03	149	82	84	51.74	72	0.8136	67.4078	4.01	12	21	1.32	85.2	4.348	5.8	5.5	2.28	113	1.72	5.8	5.8	6.4	6.5	6.3	7.2	7.1	7.5	7.2
86	26	25	0	1	0	1	0	0	0	0	0	0	0	0	67	24	3	1	174	75	1.89525	24.77	137	80	69	41.74	84	0.9492	61.4262	4.62	23	27	1.12	78.5	2.629	8.6	5.31	0.88	62.7	0.66	8.6	7.5	6.9	6.5	6.7	6.9
87	26	26	0	0	0	0	0	0	0	1	0	0	1	0	63	22	2	0	157	53	1.51779	21.5	108	78	58.5	76.89	44	0.4972	92.7762	3.62	14	27	1.398	82.23	1.724	9.3	6.6	1.29	53.6	1.03	9.3	9.3	9.5	9.9	9.7	8.8	8.8	10.6	8.6
88	27	28	1	0	0	0	0	0	1	1	0	0	0	0	63	14	3	1	161	83	1.87035	32.02	141	65	85	18.33	60	0.678	101.721	5.33	19	21	1.29	80	2.172	8.2	7.2	2.44	72	2.01	8.2	7.5	6.7	7.6
89	29	28	0	1	0	0	0	0	0	0	0	0	0	0	65	18	3	1	169	69	1.791	24.16	148	74	203.7	87.28	66	0.7458	78.1962	3.12	16	19	1.39	85.39	3.54	7.6	6.6	1.42	57.4	1.14	7.6	7.4	6.9	7.9	6.6
90	25	27	0	1	0	0	0	0	1	0	0	0	1	0	60	24	3	0	154	59	1.5665	24.88	101	60	35	19.22	59	0.6667	77.534	4.35	19	21	2.07	96.07	0.94	7.2	5.85	2.16	96.8	1.66	7.2	8.7	8.2
91	23	17	0	1	0	0	0	0	0	1	1	0	0	0	70	14	0	1	175	89	2.04673	29.06	137	62	68.8	11.95	67	0.7571	81.1462	3.89	18	19	1.27	104.5	3.8	6.7	7.09	1.69	56.8	1.39	6.7	7	7.1	8	7.7
92	30	29	1	0	0	0	0	0	1	0	0	1	0	0	67	12	4	1	175	69.5	1.84252	22.69	115	67	55.75	17.11	53	0.5989	92.797	5.77	9	10	1.443	89.09	2.085	10.2	6.67	1.9	69.1	1.53	10.2	8.6	8.8	9.8	10	9.4	9.4	9.2	9.8
93	30	27	0	0	0	1	0	1	0	0	0	0	0	0	59	22	3	1	180	87	2.06888	26.85	128	84	89.93	15.96	65.5	0.74015	92.8844	3.01	26	21	1.91	109.9	2.495	7.6	6.84	1.97	67.7	1.59	7.6	7.1	6.7	6.7	6.5	7.5	6.6	6.2	6.2
94	27	28	1	0	0	0	0	0	0	1	0	0	1	0	50	10	2	1	164	64	1.69728	23.8	96	70	163.5	15.085	61	0.6893	99.3694	2.9	11	13	1.63	109.3	2.643	9.1	7.52	2.64	70.5	2.2	9.1	10.3	9.2
95	30	29	0	1	0	0	0	0	0	0	0	0	0	0	51	14	3	1	166	72	1.80016	26.13	131	82	81	18.52	45	0.5085	141.291	6.12	19	20	1.57	100.7	3.24	7.6	6.94	2.21	71.6	1.8	7.6	8.6	6.8
96	30	28	0	0	0	1	0	0	0	1	0	1	1	0	53	4	4	1	170	60	1.69495	20.76	115	65	179	89.45	103	1.1639	53.4062	8.11	23	23	2.25	100.3	2.28	5.9	5.95	2.86	114.5	2.21	5.9	6.3	6.1	6.2	6.3	5.9	6.3	6.1	7
97	22	27	0	0	0	1	0	0	1	0	0	0	0	0	78	7	2	0	161	60	1.62941	23.15	129	60	88	21.27	39	0.4407	88.8756	5.23	26	24	1.58	93.24	1.32	6.5	7.04	1.98	64.4	1.62	6.5	6.1	6.5	6.7	6.9
98	24	28	1	0	1	0	0	0	0	0	0	0	0	0	65	15	1	1	180	84	2.03825	25.93	137	72	86.18	16.53	60	0.678	92.0124	4.93	9	18	1.53	124.6	1.769	5.8	4.01	1.45	152.9	0.99	5.8	5.5	5.3	5.8	6	5.3	5.6	5.4	5.5
99	28	27	0	1	0	0	1	1	0	0	0	0	1	0	66	23	3	1	158	46	1.4357	18.43	144	78	58.63	37.16	65.5	0.74015	64.6544	3.85	14	24	1.31	68.2	1.516	5.1	4.66	2.18	150.5	1.56	5.1	5.4	5.8	5.6	6.5	6.3	5.6
100	27	26	1	0	0	0	0	0	1	0	0	0	0	0	57	8	4	1	177	76	1.92971	24.26	128	76	61	10.74	62	0.7006	94.172	4.61	19	17	2.19	103.2	0.6	5.9	5.32	2.48	127.7	1.85	5.9	6.3	5.7	6.5	7.8
101	27	21	1	1	0	0	0	0	0	1	0	0	0	0	67	12	1	1	164	75	1.81564	27.89	146	78	40	18.28	56	0.6328	96.1793	2.93	27	28	1.94	127.6	4.043	9.4	11	2.95	40.6	2.79	9.4	10.6	8.6
102	26	25	1	0	1	0	0	0	0	0	0	0	1	0	58	15	1	1	180	83	2.0279	25.62	133	73	142.8	18.28	54	0.6102	111.011	4	32	28	1.93	105.5	1.85	6.4	6.34	3.88	127.1	3.06	6.4	6.3	6.2	6.5	6.1	6.7
103	26	25	0	1	0	0	0	0	0	0	0	1	0	0	55	9	3	1	182	82	2.03371	24.76	108	71	62.1	17.54	57	0.6441	107.395	4.53	9	11	1.685	112.05	2.073	5.7	3.81	1.07	137.9	0.71	5.7	5.7	6.7	6.9	6.9	5.6
104	21	15	1	0	0	0	0	0	0	1	0	0	0	0	54	8	0	0	165	74	1.81328	27.18	110	68	120.06	13.552	81	0.9153	65.7829	4.12	19	21	1.75	89.21	4.03	8.4	9.51	2.19	40.7	1.97	8.4	8.7	6.4	8.8	8.2	8.6	7.9
105	24	20	0	1	0	0	1	0	0	1	0	0	0	0	65	21	1	0	152	60.5	1.56837	26.19	136	70	79.2	24.5	50	0.565	87.8478	2.55	33	20	1.48	100.5	1.127	8	4.3	1.73	150.2	1.2	8	8.4	8.6	9.6	8.6	11.2
106	26	21	0	1	0	0	0	1	0	0	0	0	0	0	60	23	1	0	158	63	1.64101	25.24	102	68	72	10.5	39	0.4407	119.56	4.83	25	30	1.45	97.2	1.564	9.7	9.2	2.34	45.3	2.08	9.7	10.6	9.5	8.7	8	10.7
107	27	25	1	0	0	0	0	0	1	1	0	1	0	0	58	13	3	1	173	67	1.799	22.39	115	72	130.15	22.943	94.75	1.07068	57.5695	2.56	17	24	1.74	77.24	1.33	8.6	7.28	3.07	83.5	2.53	8.6	7.5	7.3	6.6
108	26	25	0	1	0	0	0	1	0	0	0	0	1	0	57	7	2	1	165	60	1.65866	22.04	110	72	55.5	12.63	55	0.6215	97.5045	3.61	27	19	1.76	106.6	1.05	5.5	5.59	1.33	75.3	1.01	5.5	5.4	6	8.2	6.5
109	27	25	0	0	0	1	0	0	1	0	1	1	0	0	54	2	2	1	167	75	1.83966	26.89	108	72	6	18.5	64	0.7232	97.8492	3.48	19	34	1.9	91.71	1.16	7.2	6.98	3.19	92.6	2.6	7.2	7.5	9.3	7.5	7.5
110	28	25	1	0	0	0	0	0	0	0	0	0	0	0	70	16	4	1	165	70	1.77096	25.71	138	77	36	8.03	61	0.6893	81.0162	3.31	11	15	1.48	130.8	1.275	6.7	5.98	2.53	103.9	1.96	6.7	7.5	7.1	6.5
111	25	23	0	0	0	1	0	0	0	1	1	0	0	1	74	23	4	1	168	70	1.79425	24.8	138	71	64.4	14.6	70	0.791	65.7016	4.15	13	14	1.59	85.28	4.44	6.8	6.1	2.33	94.4	1.82	6.8	6.4	7.1	7.3	6.5	6.9	6.5	6.7
112	25	22	0	1	0	0	0	0	1	0	0	0	1	1	58	14	4	1	167	65	1.73111	23.31	125	76	32.4	21.1	76	0.8588	72.3609	3.56	29	25	1.46	71.13	1.17	7.3	7.9	2.05	53.6	1.74	7.3	7.9	7.7	7.6
113	23	23	0	0	1	0	0	1	0	0	0	0	0	1	53	8	4	1	170	66	1.76501	22.84	130	70	48.1	25.41	78	0.8814	74.4964	2.6	31	27	1.33	91.4	1.164	12	11.78	3.5	42.7	3.39	12	12.9	10.8	9.7
114	18	13	1	0	0	0	1	0	1	0	0	1	0	1	65	3	0	0	148	52	2.59633	26.39	111	73	40.8	35.98	53	0.5989	77.4488	5.12	15	18	1.3	100.9	4.7	9.3	10.52	1.77	29.2	1.65	9.3	9.4	7.5	5.2	6.6	6.9	7.5	9.4
115	22	18	0	1	1	0	0	0	0	0	0	0	0	1	58	12	1	0	155	55	1.5276	22.89	158	99	37.2	23.59	46	0.5198	97.4409	6.01	15	19	1.28	72.9	0.949	9.2	6.07	1.77	78.5	1.38	9.2	9.5	10.4	7.2	9	7.3
116	23	19	0	0	0	1	0	1	0	0	1	0	0	1	55	5	1	1	168	84	1.93881	29.76	137	92	125.4	31.83	56.25	0.635625	116.938	4.12	13	21	1.39	84.8	4.12	9.7	10.07	3.04	48.4	2.78	9.7	12.1	8.7	11.6
117	24	19	0	1	0	1	0	0	0	0	0	1	0	1	51	10	1	0	164	75	1.81564	27.89	120	66	50	21.57	42	0.4746	132.894	5.19	12	17	1.53	90.41	2.4	11.8	6.8	2.3	76.5	1.86	11.8	10.2	11	9.2	10.6
118	24	21	0	0	0	1	1	1	0	0	0	0	1	1	65	25	4	1	180	85	2.04853	26.23	130	77	75	26.928	59	0.6667	94.2108	4.56	14	26	1.63	87.5	2.856	7.5	10.49	1.68	28.5	1.56	7.5	7.2	8.2	8.5	8.8
119	25	22	0	0	1	1	0	0	0	0	0	0	0	1	53	11	4	1	172	74	1.86874	25.01	101	67	64.71	20.83	103	1.1639	59.7421	5.12	14	17	1.53	104.1	1.924	9.4	8.22	2.09	50.6	1.79	9.4	10.6	9.7	8.4	9.9
120	24	18	1	0	0	0	0	1	0	0	0	1	0	1	56	6	1	1	170	84	1.95551	29.07	106	59	69.55	26.29	71	0.8023	90.7725	4.06	19	18	1.8	94.7	3.13	6.9	7.26	2.22	66.2	1.83	6.9	7.1	7.5	7.2	8.1	8.6
121	19	15	1	0	0	0	1	0	0	1	0	0	0	1	66	12	1	0	160	60	1.62206	23.44	103	61	96	25.51	60	0.678	69.2624	4.59	19	26	1.43	114.2	0.904	9.6	6.55	1.49	60.2	1.19	9.6	7.8	7.8
122	26	23	0	1	0	0	0	1	0	0	1	1	0	1	79	19	3	1	170	81.5	1.93056	28.2	127	69	138	22.4	80	0.904	57.4947	3.76	19	20	1.76	90.44	4.23	7.7	5.15	0.93	69.2	0.69	7.7	7.6	7.7	7.2	8.1	7.5	7.5	8.3	7.3
123	24	23	0	0	0	1	0	0	1	0	0	1	1	1	65	11	3	0	161	54	1.55805	20.83	107	64	89.3	24.07	49	0.5537	80.5397	5.88	17	15	1.13	103.6	2.594	8.7	4.52	1.73	136.2	1.23	8.7	8.7	8.1	7.6	7	7.9	7.5	7.5	7.6
124	26	22	0	0	1	0	0	1	0	0	0	0	1	1	62	27	4	1	172	80	1.93169	27.04	129	76	64.6	27.915	73	0.8249	79.0385	3.94	18	19	1.58	101.3	2.566	8	5.35	1.42	85.7	1.06	8	8.8	8	9
125	21	22	0	1	0	0	0	0	0	1	0	0	0	1	56	25	0	0	157	84	1.84592	34.08	112	69	82	1.43	75	0.8475	77.3782	4.41	31	16	1.322	68.45	1.14	7.5	7.07	4.48	116.7	3.65	7.5	10.4	8.2	8.6	7.8
126	26	21	0	0	0	0	1	0	1	0	0	1	0	1	59	11	3	1	163	65	1.70095	24.46	147	103	22	11.68	74	0.8362	74.712	4.24	17	18	1.62	89.62	2.02	9.8	10.54	2.31	35.9	2.15	9.8	8.6	7.5	7.9	8.5
127	24	21	0	1	0	0	0	0	0	0	1	0	0	1	54	15	4	1	176	85	2.01542	27.44	115	52	108.55	16.64	68	0.7684	95.2702	4.52	20	22	1.5	107.7	1.458	7.6	9.6	2.26	41	2.04	7.6	6.7	6.8	7.7	6.7	7.3
128	22	21	1	0	0	0	0	1	0	1	0	1	0	1	57	20	2	0	165	79	1.86438	29.02	124	74	137.7	29.31	51	0.5763	104.697	4.45	17	17	1.67	95.7	0.471	6.9	5.71	1.61	82.5	1.23	6.9	6.5	8.6	6.7
129	23	22	0	0	1	1	0	0	1	0	0	0	0	1	53	8	4	1	173	67	1.799	22.39	140	79	34.5	11.26	79	0.8927	73.2571	4.28	14	13	1.18	81.7	2.015	8.6	9.17	1.91	39	1.7	8.6	6.6	8.4	7.6	6.2	8.4	6.6	6.9
130	19	24	0	1	0	0	0	1	0	0	1	1	1	1	75	17	2	1	170	75	1.86356	25.95	126	75	77.42	25.613	84	0.9492	55.6246	4.21	19	13	1.87	90.23	1.85	9	6.07	2.19	91.2	1.71	9	6.5	8.5	7.3	9.3	7.4	9.3
131	19	19	0	0	0	1	0	0	1	0	0	1	1	1	58	5	1	1	165	64	1.70478	23.51	132	85	102.14	39.06	87	0.9831	63.2005	3.9	28	26	1.45	82.5	1.65	8.6	8.2	1.9	47.4	1.63	8.6	8.2	9.7	9.8
132	23	16	0	0	0	0	0	1	0	1	0	1	0	1	66	15	1	0	152	60	1.56285	25.97	141	61	115.21	18.478	98	1.1074	44.0122	4.15	14	20	1.32	57.7	1.28	6.7	10.05	1.94	34	1.78	6.7	7.1	6.5	8.7
133	18	16	1	1	0	0	0	0	0	0	0	0	0	1	67	10	1	1	165	62.5	1.68768	22.96	118	65	74.8	14.7	94.1	1.06333	51.3141	7.58	13	18	1.41	86.48	3.16	8.6	9.92	3.1	49.8	2.82	8.6	8.9	6.1	10.3
134	25	20	0	1	0	0	0	0	0	1	0	0	1	1	58	3	2	1	176	77	1.93251	24.86	129	89	103.06	15.98	99	1.1187	58.9471	3.44	19	21	1.73	99.7	5.402	8.3	6.31	4.64	146.3	3.65	8.3	9	8.3	8.4
135	25	21	0	0	1	0	0	1	0	0	0	1	0	1	73	5	3	1	168	80	1.89902	28.34	138	89	74.57	19.538	107	1.2091	47.1158	4.61	10	15	1.62	123.5	0.57	10.4	9.61	1.41	28.7	1.27	10.4	10	13	11.4	15.2
136	24	25	0	0	0	1	0	0	1	0	0	0	0	1	61	15	4	1	172	66	1.78004	22.31	142	84	35.1	8.48	67	0.7571	78.0872	4.09	19	24	1.07	94.7	4.86	7.2	4.72	1.05	89.1	0.76	7.2	6.3	6.2	5.8	6.9	6.9
137	23	17	0	1	0	1	1	0	0	0	1	1	1	1	70	20	1	1	173	57	1.67956	19.05	132	80	66	37.3	109	1.2317	38.9282	5.27	23	22	1.44	91.2	1.33	6	4.5	2.14	159	1.51	6	5.4	5.5	5.9
138	20	11	1	0	0	0	0	0	1	0	0	0	0	1	72	22	0	0	152	63	1.59559	27.27	145	68	64.8	26.01	76	0.8588	53.6348	3.21	18	27	1.31	101.45	1.571	13.2	10.96	1.27	21.3	1.2	13.2	9.1	8.8	7.6	8.9	7.3	8.4	7.2
139	23	18	0	1	0	0	0	1	0	0	0	1	0	1	68	18	1	0	155	53	1.50374	22.06	114	61	24	30.24	42	0.4746	91.7315	5.37	16	19	1.38	78.7	2.85	9.7	10.23	1.77	30.7	1.63	9.7	10.9	8.9	10.5	7.2	7.8	7.5	8.6	7.5
140	24	16	0	1	0	0	0	0	1	0	1	0	1	1	56	18	1	1	168	79	1.88889	27.99	154	104	43.7	23.68	83	0.9379	75.6024	3.12	22	29	1.18	65.4	3.145	10.8	11.43	0.9	15.2	0.87	10.8	10.5	8.4	9.7	9.2
141	23	24	0	1	0	0	0	0	1	0	1	0	0	1	71	20	3	0	152	68	1.64824	29.43	126	60	70	53.52	75	0.8475	57.625	3.99	38	24	1.66	107.3	2.434	9.1	8.45	2.95	62.5	2.55	9.1	8.3	7.9	11.8	9.8	10.2
142	23	19	0	0	0	1	0	0	0	1	0	1	1	1	68	16	1	0	156	80	1.79968	32.87	131	66	189	28.27	85	0.9605	57.1666	6.5	17	20	1.38	93.1	3.561	7.5	6.99	2.36	74.1	1.92	7.5	7	8.9	9.1	6.9
143	21	18	1	0	0	0	0	0	1	0	0	0	0	1	70	8	1	1	170	63.5	1.73628	21.97	140	72	137.43	18.4	88	0.9944	51.9616	3.78	28	24	1.54	81.3	4.547	6.9	4.54	1.03	95	0.73	6.9	6.5	6.8	8
144	24	18	0	1	0	0	0	1	0	0	0	0	0	1	64	16	1	0	152	49	1.43396	21.21	100	61	58	26.78	48	0.5424	82.1421	5.12	15	18	1.33	97.36	3.66	11.1	11.83	1.78	24.2	1.74	11.1	7.6	9.9	9.2
145	25	22	0	1	0	1	0	1	0	0	0	1	1	1	58	8	3	1	174	76	1.90594	25.1	143	70	127	16.198	81	0.9153	72.1019	3.95	13	17	1.26	97.5	3.997	8.5	10.87	3.73	50.7	3.5	8.5	8.8	9.8
146	27	22	1	0	0	0	0	0	1	0	0	0	1	1	58	19	3	1	178	87	2.05218	27.46	135	93	96	22.11	83	0.9379	74.8088	5.76	6	13	1.18	138.6	2.14	7	9.85	2.31	40	2.1	7	6.9	9.7	9.4
147	24	21	0	0	1	1	0	0	0	0	0	1	0	1	64	11	4	1	165	65	1.71605	23.88	130	88	175	40.808	70	0.791	73.4536	5.02	29	26	1.75	95.9	2.28	8.6	9.6	2.61	45.9	2.35	8.6	8.7	12
148	22	12	0	0	1	1	0	0	0	0	0	1	0	1	64	5	0	1	171	80	1.92354	27.36	150	78	70	18.832	68	0.7684	83.0247	3.3	12	28	0.88	46.4	2.57	6.6	6.48	3.14	104.7	2.49	6.6	7.8	7.7
149	20	14	0	0	0	1	0	0	0	1	0	0	1	1	58	21	1	0	156	57	1.55822	23.42	110	68	109.76	12.566	53	0.5989	85.9246	4.02	24	17	1.68	91.6	2.416	8.3	5.93	3.25	126.2	2.51	8.3	6.9	9.9	7.6
150	24	23	0	0	1	0	0	0	1	0	1	1	0	1	72	15	2	1	167	74.5	1.83443	26.71	153	66	63.8	8.21	71	0.8023	69.4735	6.47	9	17	1.21	97.9	0.758	8.8	7.89	1.87	50.2	1.58	8.8	8.2	8.1	9.9	7.3	11.1
151	23	23	1	1	0	0	0	0	0	0	0	0	0	1	56	16	4	1	184	86.5	2.09696	25.55	149	96	85.8	0.87	57	0.6441	108.579	4.57	14	15	1.23	93.5	1.211	6.5	7.07	1.96	63.5	1.6	6.5	11	9	9.6	11.1	7.9	9.2
152	29	24	0	0	1	0	0	0	0	1	0	1	0	1	59	8	3	0	165	65.6	1.72277	24.1	125	70	27	21.6	55	0.6215	85.1399	5.01	16	16	1.73	110.6	3.016	9.1	6.01	1.73	78.7	1.35	9.1	8.7	6.9
153	24	20	0	1	0	0	0	1	0	0	1	0	0	1	70	27	3	0	146	54	1.45141	25.33	143	73	151.5	20.48	69	0.7797	57.3042	4.34	8	15	1.76	85.99	2.78	9.9	5.71	0.92	56.1	0.7	9.9	11.3	8.8	9.4
154	24	19	1	1	0	0	0	0	0	0	1	1	0	1	72	20	1	1	170	73	1.84227	25.26	134	74	84	11.95	77	0.8701	62.5031	4.36	23	10	1.98	94.7	1.351	7.8	8.45	1.17	31.5	1.01	7.8	7.2	9.9	8
155	24	19	0	0	1	0	0	0	1	0	0	0	1	1	59	11	2	0	163	61	1.65565	22.96	131	79	167.2	51.5	74	0.8362	61.2278	3.12	18	17	2.3	119.9	2.48	8.3	7.7	2.91	72.7	2.44	8.3	8.9	6.5	6.3	7.7
156	21	19	0	0	0	0	0	0	1	1	0	1	0	1	60	2	3	0	150	55	1.49172	24.44	122	78	78.5	21.17	50	0.565	89.5632	6.58	13	19	1.73	114.9	3.779	8.6	7.15	1.95	61.9	1.6	8.6	6.7	6.5
157	26	24	0	1	0	1	0	0	0	0	0	0	0	1	71	18	4	0	157	49	1.468	19.88	115	67	171.2	28.52	53	0.5989	65.9744	3.88	15	31	1.55	87.24	2.56	10.3	10.53	2.05	32.7	1.91	10.3	7.9	6.8	6
158	25	24	0	0	0	1	0	0	1	1	0	0	1	1	58	13	4	1	168	57	1.64423	20.2	91	66	109.2	25.9	67	0.7571	75.782	5.6	16	18	1.33	106.9	1.676	14.4	11.51	1.63	23.5	1.57	14.4	12	10.7	10.8
159	26	23	1	1	0	0	0	0	0	0	1	1	1	1	55	2	4	1	170	64	1.74208	22.15	127	77	126	25.784	60	0.678	92.9595	4.33	17	17	1.37	91.48	3.19	8.4	10.07	0.83	18.1	0.76	8.4	10.6	7.6	7.4	7.5
160	22	18	0	0	0	1	1	0	1	0	0	0	0	1	64	20	1	1	170	64	1.74208	22.15	138	96	120	72.46	71	0.8023	70.2395	4.74	16	31	1.38	83.3	0.978	7.7	4.96	1.27	92	0.93	7.7	7.2	8.7	7.6	7.5	8.7	7.8	8.5	8.4
161	23	22	0	1	0	0	0	1	0	0	0	1	0	1	64	13	2	1	163	60	1.64406	22.58	134	67	30.8	8.65	64	0.7232	77.4074	4.53	12	17	1.37	85	1.68	7.9	5.5	1.28	75.7	0.97	7.9	6.1	6.1	6	5.7
162	27	24	1	0	0	0	0	0	1	0	1	1	0	1	60	15	3	1	174	77	1.91656	25.43	140	78	98	12.45	83	0.9379	69.1662	3.91	19	23	1.88	110.5	1.678	8.2	8.2	2.61	60	2.24	8.2	7.6	7
163	20	24	0	1	0	1	0	0	0	0	0	0	0	1	66	8	2	0	155	58	1.56248	24.14	141	74	67.45	25.3	42	0.4746	99.2956	4.53	10	18	1.49	118.2	0.85	8.4	7.57	1.17	38.7	0.98	8.4	8	6.7	6.1	5.9
164	23	20	0	0	0	0	0	0	1	1	0	0	1	1	56	16	2	0	150	53	1.46842	23.56	112	76	78	19.28	54	0.6102	85.2403	4.8	20	20	1.41	74.6	1.069	6.3	5.37	0.99	66.5	0.74	6.3	6.2	6.9	7.6
165	19	16	0	0	0	1	1	0	0	1	0	1	0	1	59	10	2	1	162	72	1.76861	27.43	109	64	33.8	18.94	65	0.7345	90.6124	4.11	18	19	2.4	117.8	0.66	6.4	6.4	2.45	89.5	1.94	6.4	9.5	6.6
166	23	20	1	1	0	0	0	0	0	0	0	1	0	1	65	2	4	1	175	82	1.9767	26.78	136	85	85	11.76	67	0.7571	82.9421	2.81	27	20	1.47	85.8	0.807	9.3	6.2	2.74	102.9	2.15	9.3	6.3	6.1
167	27	24	0	0	1	0	1	0	0	0	0	0	0	1	68	24	4	0	180	80	1.99642	24.69	147	75	55.5	17.6	75	0.8475	58.404	3.22	37	28	1.38	79.4	2.212	8.5	5.73	1.88	91.3	1.44	8.5	7.7	7.5	7.4	7.7	7.9
168	25	22	0	1	0	0	0	0	1	1	0	0	1	1	57	13	2	1	167	66	1.74238	23.67	133	76	150	28.55	84	0.9492	66.8521	3.24	13	19	1.77	128.6	1.316	7.7	9.39	1.7	34.3	1.52	7.7	7.9	8.5	9.5
169	24	20	1	0	0	0	0	1	0	0	0	1	0	1	54	13	2	1	176	85	2.01542	27.44	117	72	25.3	17.15	61	0.6893	106.203	4.01	25	26	1.76	99.4	4.05	7.3	6.2	2.59	98.8	2.03	7.3	9	9.5	6.6	9.1	9
170	20	20	0	0	1	1	0	0	0	1	0	0	1	1	50	10	2	1	162	60	1.63674	22.86	111	83	87.63	22.728	85	0.9605	69.3283	3.25	13	16	1.4	96.9	1.833	6.2	4.82	2.7	163.5	1.95	6.2	5.8	8.5	6.4
171	23	24	0	0	1	0	0	0	1	0	0	1	0	1	67	10	3	1	177	76	1.92971	24.26	137	83	68.4	13.51	69	0.7797	74.4233	6.09	25	27	1.77	124.4	2.13	10.4	9.5	1.7	33.6	1.53	10.4	7.8	9.5	7.6	8.5
172	23	13	0	1	0	0	0	0	0	1	0	1	0	1	70	9	0	0	158	68	1.69515	27.24	136	74	85.5	25.31	58	0.6554	73.5027	1.54	24	25	2.01	137.9	3.64	9.2	10	2.63	43.1	2.4	9.2	10.8	8.5	10.7	10.1
173	24	22	0	1	0	0	0	0	1	0	0	0	0	1	52	7	3	1	168	71	1.8051	25.16	126	73	76.1	20.9	65	0.7345	95.1134	3.29	22	22	1.88	98.84	3.576	10.8	8.75	2.51	52.1	2.19	10.8	9.7	8.2	8.7	10.9
174	29	23	1	0	0	0	1	0	1	0	1	1	1	1	76	22	4	1	158	65	1.66296	26.04	114	61	51.35	27.727	60.5	0.68365	73.8536	6.7	35	27	1.67	104.2	2.24	7.4	8.29	1.99	48.1	1.71	7.4	9.4	8.7	10.2	8	7.3
175	18	18	0	1	0	0	0	0	0	1	1	0	0	1	74	8	1	0	160	77	1.80348	30.08	136	86	182	40.82	79	0.8927	54.1538	5.01	7	19	1.49	97	1.492	9	11.44	2.88	37.7	2.76	9	8.1	9	7.5	8.6	11.3
176	23	23	0	0	0	1	0	0	1	0	0	0	0	1	67	10	3	1	172	75	1.87943	25.35	126	83	123.5	13.69	66	0.7458	78.8368	3	12	15	1.55	92	2.797	9.6	8.1	2.33	56.3	1.99	9.6	9.2	9.2	9.7	8.9	7.2	7.1	7.3
177	21	18	0	1	0	0	0	1	0	0	0	1	0	1	61	15	1	0	160	75	1.78342	29.3	124	85	86.18	46.725	86	0.9718	58.6501	4.06	12	15	1.54	92.58	0.73	9.9	7.92	3.6	81.3	3.05	9.9	8.9	9.5	7.2	7	7.1
178	24	23	0	1	0	0	0	0	1	0	0	0	1	1	73	6	2	1	160	65	1.67819	25.39	130	74	61.33	19.238	103	1.1639	45.0012	4.05	14	14	2.12	125.5	1.049	7.8	8.88	2.44	49.7	2.15	7.8	11.6	10	9.1
179	26	24	0	0	1	1	0	0	0	0	0	1	0	1	52	14	3	1	172	70	1.82512	23.66	125	78	34.5	9.76	70	0.791	86.1204	3.65	16	12	1.91	132.6	1.2	7.8	9.03	2.17	44.2	1.92	7.8	7.5	6.5	7.3	7.6	6.3	8.5	6.8	8
180	21	22	0	0	0	0	0	0	1	1	0	0	0	1	50	8	2	1	168	71	1.8051	25.16	122	72	84.25	24.203	106	1.1978	66.2776	4.51	14.3	33	1.47	85.7	2.402	9.1	8.45	1.92	45.3	1.66	9.1	9.1	6.1	6.6
181	24	23	0	0	1	1	0	0	0	0	1	0	1	1	64	24	4	1	180	79	1.98578	24.38	97	63	104.5	12.52	116	1.3108	46.555	3.82	38	27	1.17	79.4	0.569	8.6	10.59	4.01	56.1	3.72	8.6	6.7	6.5	6.9	10.6	6.2	6.8	6.4	5.8
182	21	21	0	1	0	0	0	1	0	0	1	1	0	1	79	17	3	1	173	58	1.69202	19.38	119	73	94.73	26.84	77	0.8701	48.5037	4.51	19	23	1.31	100.8	1.081	9.3	11.11	0.78	14.3	0.74	9.3	6.3	10.2	9.1	8.3	9
183	22	19	1	0	0	0	0	0	1	0	0	0	0	1	70	5	1	1	172	67	1.79146	22.65	111	64	70	11.53	79	0.8927	59.1908	3.59	16	19	1.48	88	1.155	7.5	9	2.99	56.8	2.64	7.5	7.3	7.1	13.2	7.5	7.3	7	6.8	7.2
184	25	24	0	0	0	1	1	0	0	1	0	1	0	1	53	16	3	1	164	71	1.77383	26.4	117	51	62.3	25.893	90	1.017	69.1093	4.5	17	19	1.45	119	2.829	6.3	5.99	3.81	139	2.95	6.3	9.1	6.1	6.1
185	29	23	1	1	0	0	0	0	1	0	0	1	0	1	54	8	4	1	176	75	1.91101	24.21	145	92	138.6	16.73	67	0.7571	89.9778	3.25	9	16	1.33	112.5	2.3	8.9	5.78	1.73	84.8	1.33	8.9	10.7	6.3	7.3
186	25	24	0	0	0	0	0	0	0	1	1	0	1	1	78	9	3	1	159	70	1.72403	27.69	142	78	178.2	77.088	72	0.8136	62.449	5.96	24	24	1.32	90	2.75	9.5	9.09	2.7	51.6	2.39	9.5	6.5	9.2	11.5	11.8
187	26	22	1	0	1	0	0	0	1	0	1	0	0	1	75	27	4	1	173	75	1.88734	25.06	121	54	109.85	19.25	87	0.9831	53.0297	2.87	31	23	1.27	74.8	1.478	7.5	5.19	2.56	136.8	1.9	7.5	7.1	8.5	7.5	6.7	6.3	5.9	8.6	5.7
188	25	23	0	1	0	0	0	1	0	0	0	1	0	1	70	12	3	1	166	69	1.76789	25.04	125	81	55.5	10.32	69	0.7797	70.7224	4.92	9	12	1.35	92.57	2.83	9.1	4.67	1.3	105.2	0.93	9.1	7.9	7.4	7.1	7.6	8	6.6
189	27	23	1	0	0	0	0	0	1	1	0	0	1	1	61	17	3	1	180	75.5	1.9479	23.3	134	75	98.7	17.02	104	1.1752	52.5883	4.75	14	18	1.44	94.2	0.795	6.8	5.73	2.38	107.8	1.82	6.8	6.5	7.2	9.7
190	23	24	0	1	0	0	0	0	0	1	0	1	0	1	63	14	3	1	173	69	1.82163	23.05	155	81	69.8	14.44	58	0.6554	89.8185	6.12	28	31	1.58	105.5	1.788	9.2	9.85	1.39	27.1	1.27	9.2	7	9.8
191	20	24	1	0	0	0	0	0	1	0	0	1	0	1	72	12	4	1	171	80	1.92354	27.36	146	81	123	14.872	59	0.6667	85.6169	5.43	33	30	1.66	76.98	2.51	11.4	10.6	1.42	24.3	1.33	11.4	9	8.5	8.3	7.6	7.3	9.4
192	28	24	0	0	0	1	0	1	0	1	0	0	0	1	54	17	3	1	175	81	1.96641	26.45	110	79	123	24.98	93	1.0509	68.0362	3.4	14	19	1.24	88.75	4.73	11.2	9.28	1.3	28.7	1.16	11.2	8.5	7.2	8.7	7.5
193	23	24	0	0	0	1	0	0	1	1	0	1	0	1	56	17	3	1	174	83.5	1.98372	27.58	148	76	86.4	11.968	72	0.8136	87.7135	4.56	9	15	1.28	71.98	2.37	9.1	10	4.1	61.6	3.73	9.1	6.8	8.9
194	29	23	0	1	0	0	0	0	0	0	0	1	1	1	62	26	4	1	172	78	1.91102	26.37	161	88	105.63	38.86	62	0.7006	91.7165	3.24	22	20	1.48	76.38	1.21	7.3	6.96	1.05	42	0.86	7.3	8.5	8.2	9.5	7.7	8.6
195	25	23	0	0	0	1	0	0	1	0	1	0	0	1	82	30	3	1	162	62	1.65971	23.62	125	65	186	19.66	107	1.2091	36.1676	4.34	11	17	1.06	91.84	2.22	5.9	3.79	1.33	161.3	0.89	5.9	6.5	7.6	7.4
196	24	23	1	0	1	0	0	0	0	0	0	1	0	1	72	12	4	1	171	70	1.81742	23.94	121	69	93.33	11.93	67	0.7571	69.8219	4.02	24	17	1.68	91.6	2.416	12	10.27	3.83	56.5	3.52	12	10.2	9	8.5	6.5	11.2
197	27	22	0	1	0	1	0	0	0	0	0	0	1	1	63	8	4	1	158	45	1.42236	18.03	137	76	200	10.81	65	0.7345	66.9416	5.42	21	23	1.11	86.45	0.72	6.5	6.19	0.96	49.4	0.75	6.5	6.9	7.7	6.5	6	6.6
198	22	21	0	0	1	0	0	0	1	0	0	1	0	1	66	24	3	1	173	67.5	1.8047	22.55	128	63	114	10.824	70	0.791	70.6233	3.31	31	19	1.46	66.57	1.43	8.6	5.33	3.37	157.9	2.52	8.6	8.5	11.5	7.5	10.5	7.6
199	25	20	1	0	0	0	0	1	1	0	1	0	0	1	63	21	4	1	180	82	2.01748	25.31	151	76	165	18.23	109	1.2317	51.2841	3.1	9	12	0.96	81.82	2.02	8.2	6.31	1.85	75.3	1.46	8.2	10.1	9.3	7.6	7.5
200	21	23	0	1	0	0	0	0	0	1	0	0	1	1	56	15	2	0	164	62	1.67454	23.05	139	85	88	13.79	51	0.5763	92.5848	4.81	15	20	1.62	102.9	5.535	8.1	10.72	1.31	22.5	1.23	8.1	10.2	11.9	10.5
201	24	22	0	0	1	0	0	0	1	0	0	1	0	1	65	26	2	0	162	72	1.76861	27.43	141	75	60	30.42	42	0.4746	110.369	5.17	20	31	1.63	106.3	3.056	8.2	7.82	2.26	58.6	1.91	8.2	7.4	7.2	9.7
202	24	22	0	0	0	1	0	0	0	1	0	0	0	1	75	13	0	0	150	70	1.65272	31.11	138	71	130.75	83.8	66	0.7458	63.3289	4.74	19	21	1.72	98.74	2.16	7.7	7.28	1.65	53.1	1.36	7.7	10.3	8.2	8.7	9.1	9.1	9.2	5.6	9.5
203	26	24	1	0	0	0	0	0	1	0	1	1	0	1	58	4	2	0	168	65	1.73862	23.03	130	76	75.9	11.7	45	0.5085	103.429	5.87	18	19	1.33	98.5	3.341	5.9	4.53	2.77	187.5	1.96	5.9	6.1	9.7	6	9.7
204	27	21	0	0	0	1	0	1	0	0	0	0	0	1	73	24	0	1	163	70	1.75537	26.35	142	80	88.98	44.3	87	0.9831	54.8528	4.71	16	22	1.49	120.1	2.932	7.9	9	1.38	31.7	1.22	7.9	6.8	8.8	10	8	7.2	7
205	24	21	0	0	0	0	1	0	1	1	0	1	1	1	62	15	2	1	176	76	1.9218	24.54	120	62	120.03	10.058	70	0.791	78.7074	3.69	14	14	1.11	103.8	0.84	9.7	8.33	1.18	32.6	1.02	9.7	11.3	10.7	8.7	8.7
206	25	24	1	1	0	0	0	0	0	0	1	0	0	1	57	11	4	1	176	96	2.12241	30.99	150	90	74.1	16.297	73	0.8249	91.8571	3.74	19	20	1.75	96.11	2.41	7	6.52	3.68	116.3	2.92	7	7.6	8.2	9.9
207	21	21	0	1	0	0	0	0	0	1	0	1	1	1	54	13	2	1	168	70	1.79425	24.8	126	71	175	55.76	60	0.678	99.8798	5.94	17	19	1.83	120.9	3.771	8.1	10.37	4.52	63.9	4.17	8.1	9.6	8.6	7.4
208	24	23	0	0	1	0	0	0	0	1	0	0	0	1	68	19	2	0	170	69	1.79867	23.88	113	85	48	9.01	60	0.678	69.8894	3.87	19	21	2.03	112.6	0.831	8	7.12	1.72	57	1.41	8	6.5	9.2	7.1	7.9	7.4
209	20	23	1	0	0	0	0	0	1	0	0	0	0	1	50	6	4	1	178	75	1.92673	23.67	118	76	112	24.024	95	1.0735	65.8677	4.31	17	20	1.87	130.9	1.08	8	8.39	1.62	40.5	1.4	8	7.5	9.1	6.5	8.3
210	25	21	0	0	0	1	0	1	0	0	0	1	1	1	71	20	2	0	160	63	1.65605	24.61	128	65	45	27.73	59	0.6667	67.5457	4	19	20	1.94	91.9	2.258	11.8	6.42	1.01	47.7	0.8	11.8	9.5	9.9	9.1
211	19	21	1	0	0	0	1	0	1	0	1	1	0	1	60	14	3	0	161	63.5	1.66914	24.5	122	74	6	18.92	47	0.5311	98.3117	3.49	9	14	1.37	90.1	1.56	8.9	7.28	1.5	49.6	1.24	8.9	8	10.3	9.4
212	23	20	0	1	0	0	0	1	0	0	0	0	0	1	65	10	2	1	178	82	2.00121	25.88	132	83	79.9	23.76	77	0.8701	71.2865	4.7	16	20	1.42	81.2	1.316	7	6.9	2.24	73.1	1.82	7	7.9	5.9	7.6	6.3	7
213	22	20	1	0	0	0	0	0	0	1	0	1	0	1	61	23	3	1	173	62	1.74067	20.72	133	75	45.5	20.48	69	0.7797	72.8397	5.02	10	11	1.21	83.05	1.54	8.2	9.24	0.97	23.4	0.87	8.2	7.1	6.6	7.1	6.8
214	26	22	0	1	0	0	0	0	1	0	0	0	1	1	52	12	2	1	176	87.5	2.04041	28.25	139	94	89.8	13.013	97	1.0961	69.4892	3.1	16	24	1.6	78.86	2.46	9.4	9.91	3.32	52.7	3.02	9.4	8.8	7.1	10.8	8.9	10.3
215	20	13	0	0	1	0	1	0	1	0	1	0	1	1	64	13	0	1	165	71	1.78167	26.08	121	73	39.9	60.15	46	0.5198	117.598	4.94	16	17	1.31	84.49	3.01	11.8	9.83	0.92	20.1	0.84	11.8	14.1	11.7
216	24	24	0	1	0	0	0	0	1	0	0	1	0	1	66	25	3	1	175	61	1.74315	19.92	112	67	67.2	9.4	76	0.8588	60.8595	3.15	30	21	1.67	107.5	3.09	8.6	7.59	1.78	52	1.49	8.6	7.3	7.8	6.5	6.7	8.3	10.2	7.7	6.3
217	28	23	0	1	0	1	0	0	0	0	0	0	0	1	63	28	4	0	153	48	1.42822	20.5	130	80	105.83	21.59	58	0.6554	67.7395	4.27	27	25	1.52	97.1	3.969	6.5	4.35	0.98	99.9	0.69	6.5	6.9	6.9	7.2	6.1	6.7	6.5	6.4	6.6
218	29	21	1	0	1	0	0	0	0	0	0	1	0	1	68	20	2	1	170	73.5	1.84763	25.43	117	67	30	12.92	81	0.9153	63.159	4.74	12	14	1.7	83.7	1.332	6.6	6.33	2.93	103.9	2.31	6.6	7	6.6	6.5	6.6	6.1	6	6.5	6.4
219	26	22	0	0	0	1	0	0	1	0	0	0	1	1	61	11	3	0	160	59.5	1.6163	23.24	108	73	76.2	21.468	54	0.6102	81.7637	4.13	33	23	1.85	105.34	2.684	7	5.94	2.29	98	1.77	7	7.3	6.8	6.9	6.8	6.5	6.4	7.2
220	22	13	1	0	1	0	0	0	0	0	1	1	0	1	53	22	0	1	172	75	1.87943	25.35	100	76	119	24.16	76	0.8588	81.5936	4.42	21.04	21.7	1.539	96.05	2.204	6.1	7.2	1.83	58.4	1.51	6.1	7.8	8.1
221	23	23	0	1	0	0	0	1	1	0	0	0	0	1	57	8	3	1	169	60	1.68771	21.01	146	80	106	21.08	74	0.8362	71.2219	3.45	16	14	1.35	92.9	1.441	9.1	10.1	2.05	34.9	1.88	9.1	8.6	7.8	8.6	8.5
222	24	22	0	0	0	1	1	0	0	1	0	1	1	1	73	19	3	0	155	57	1.55097	23.73	122	57	104.99	31.49	68	0.7684	54.9757	2.11	9	11	1.4	114.3	0.603	8.3	8.23	1.67	42.8	1.43	8.3	7.6	8.6	8.3
[truncated: 15 more columns]
